# Supplementary material for: Sulfidation of MoO3/γ-Al2O3 towards a highly efficient catalyst for CH4 reforming with H2S
Source: Royal Society of Chemistry journal article supplement (doi:10.1039/d0cy02226h), 2020-11-27
Supplement: d0cy02226h1.pdf [file d0cy02226h1.pdf]

## **Sulfidation of MoO<sub>3</sub>/γ-Al<sub>2</sub>O<sub>3</sub> towards highly efficient catalyst for CH<sub>4</sub> reforming with H<sub>2</sub>S**

Hao Wang<sup>a</sup>, Jingxian Wu<sup>a</sup>, Zhihuang Xiao<sup>a</sup>, Zhejie Ma<sup>a</sup>, Ping Li<sup>a,\*</sup>, Xinwei Zhang<sup>b</sup>,  
Hongying Li<sup>b</sup>, Xiangchen Fang<sup>b</sup>

<sup>a</sup> *State Key Laboratory of Chemical Engineering, East China University of Science and Technology, Shanghai 200237, China*

<sup>b</sup> *Dalian Petrochemical Research Institute, SINOPEC, Dalian 116045, Liaoning, China*

\*Corresponding author.

*E-mail address:* lipingunilab@ecust.edu.cn (P. Li)

## **Supporting Information**

Fig. S1 illustrates certain results of our previous study (Ref. [24]), which we obtained using AspenPlus software in light of the principle of minimum Gibbs free energy. The conditions set for reaction equilibrium calculation were 15 mol% H<sub>2</sub>S and 0.1 MPa while changing the CH<sub>4</sub> molar fraction from 0 to 20 mol% (balanced with N<sub>2</sub>) and the temperature from 400 to 1000 °C in an isothermal isobaric Gibbs reactor. Amorphous carbon was selected as a product of CH<sub>4</sub> dissociation. The results show that the addition of CH<sub>4</sub> can significantly increase the equilibrium conversion of H<sub>2</sub>S, especially when the molar ratio of CH<sub>4</sub>/H<sub>2</sub>S is below the reformation stoichiometric ratio, i.e. 1/2. Furthermore, the increment greatly depends on reaction temperature, and high temperature is beneficial to H<sub>2</sub>S conversion.

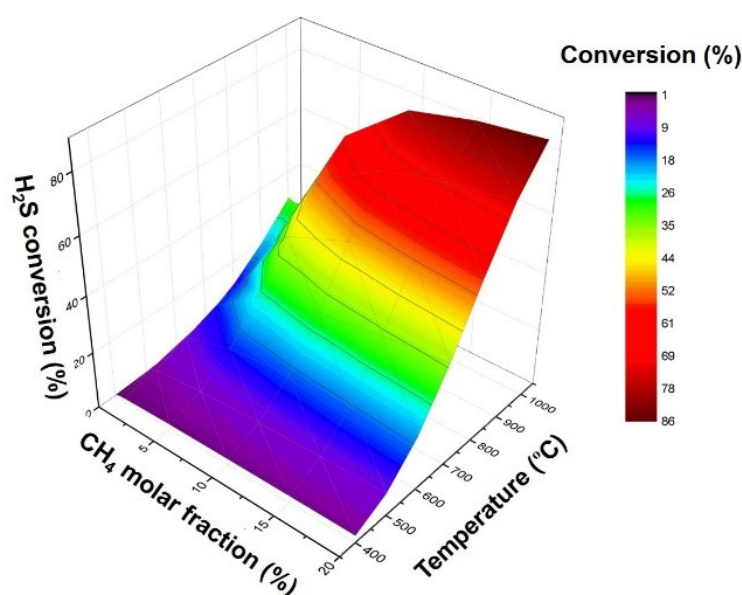

**Fig. S1.** Equilibrium conversion of 15 mol% H<sub>2</sub>S as functions of CH<sub>4</sub> molar fraction (0 - 20 mol%) and temperature (400 – 1000 °C). Other conditions: 0.1 MPa in an isothermal isobaric Gibbs reactor, simulated using AspenPlus software based on the principle of minimum Gibbs free energy (Ref. [24]).

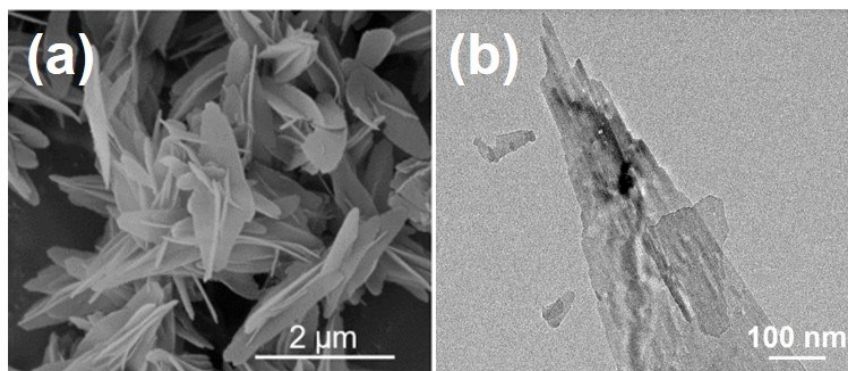

**Fig. S2.** Morphology of  $\gamma$ - $\text{Al}_2\text{O}_3$  synthesized. (a) SEM image showing clustered nanosheets architecture, and (b) typical TEM image of a piece of  $\gamma$ - $\text{Al}_2\text{O}_3$  nanosheet.

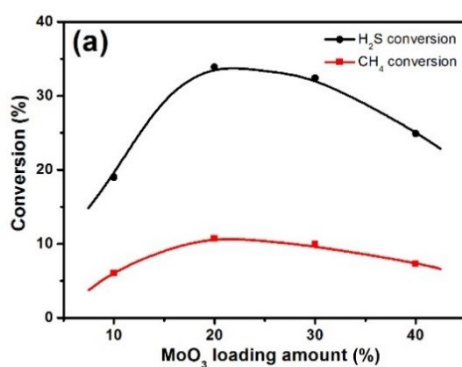

**Fig. S3.** Conversions of  $\text{H}_2\text{S}$  and  $\text{CH}_4$  as a function of  $\text{MoO}_3$  weight loading supported on  $\gamma$ - $\text{Al}_2\text{O}_3$  in  $\text{CH}_4/\text{H}_2\text{S}$  reforming process. Sulfidation condition: 600 °C, 1 h. Reaction conditions:  $\text{CH}_4/\text{H}_2\text{S}/\text{N}_2 = 1.5:1:7.5$  (vol), 800 °C, 1 atm and GHSV = 20000  $\text{h}^{-1}$ .

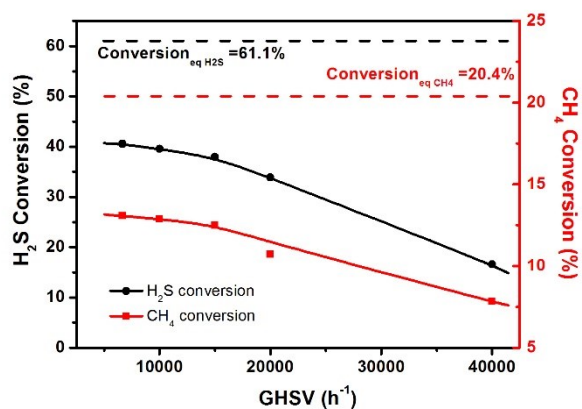

**Fig. S4.** Conversions of  $\text{H}_2\text{S}$  and  $\text{CH}_4$  as a function of GHSV in  $\text{CH}_4/\text{H}_2\text{S}$  reforming process. Sulfidation

condition: 600 °C, 1 h. Reaction conditions:  $\text{CH}_4/\text{H}_2\text{S}/\text{N}_2 = 1.5:1:7.5$  (vol), 800 °C, 1 atm. Two dotted lines present the equilibrium conversions of  $\text{CH}_4$  and  $\text{H}_2\text{S}$  under the corresponding conditions.

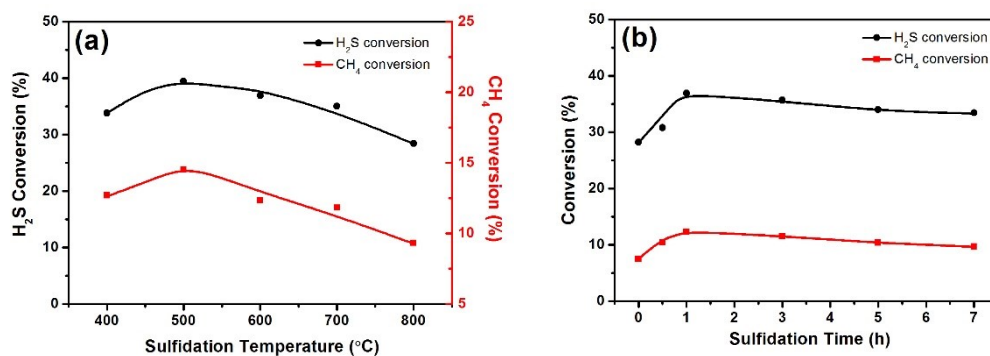

**Fig. S5.** Conversions of  $\text{H}_2\text{S}$  and  $\text{CH}_4$  as a function of (a) sulfidation temperature and (b) time over 20 wt%  $\text{MoO}_3/\text{Al}_2\text{O}_3$  catalyst (repetitive test for Figs. 1(a) and 5(a), respectively).

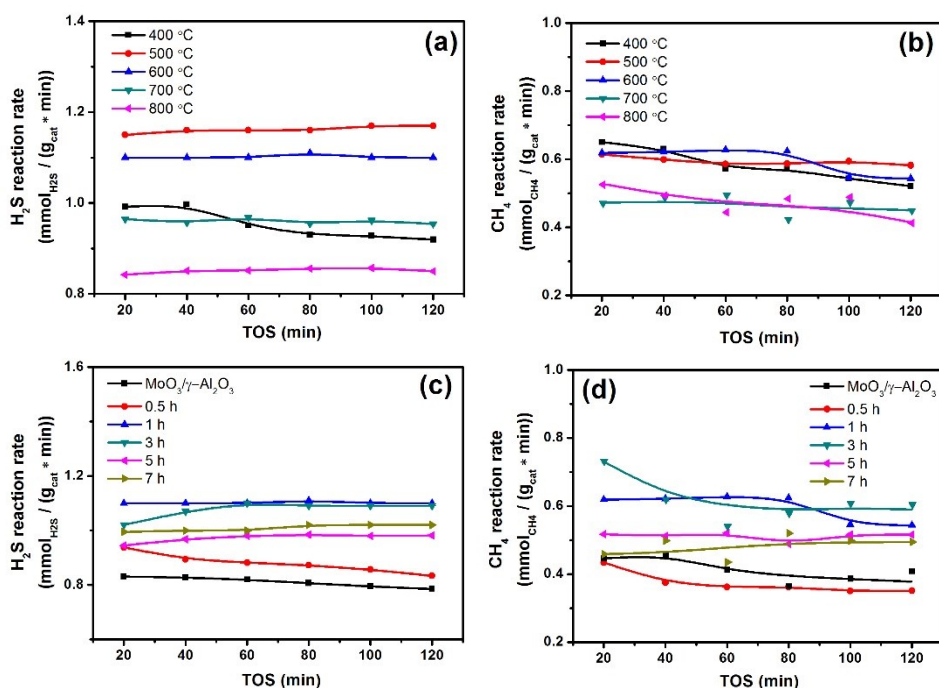

**Fig. S6.** Conversions of  $\text{H}_2\text{S}$  and  $\text{CH}_4$  changing with the time on stream (TOS) in 2 h for the  $\text{MoO}_3/\gamma\text{-Al}_2\text{O}_3$  catalyst sulfurized at different temperatures with 1 h (a, b) and sulfurized with different time at 600 °C (c, d).



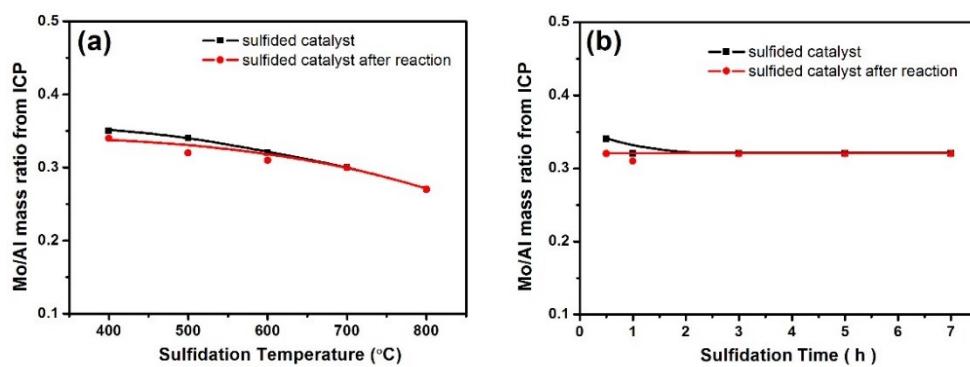

**Fig. S7.** Mo/Al mass ratio of sulfurized  $\text{MoO}_3/\gamma\text{-Al}_2\text{O}_3$  catalyst before and after reaction as a function of (a) sulfidation temperature and (b) sulfidation time.

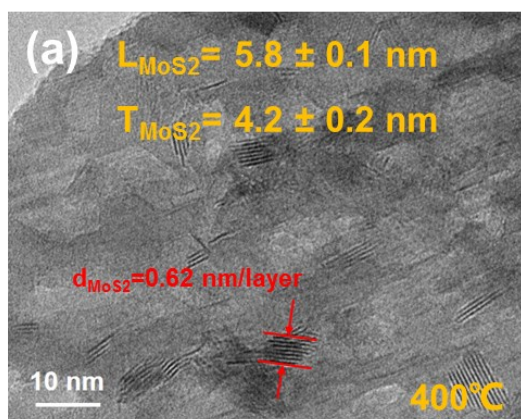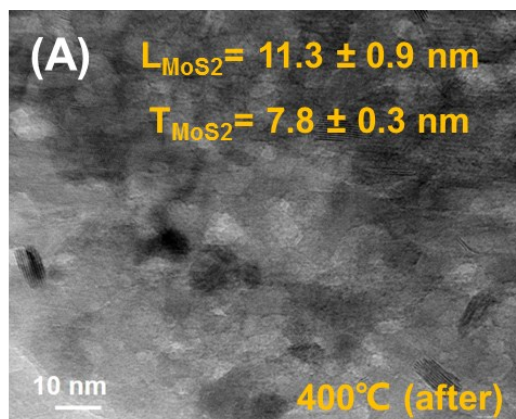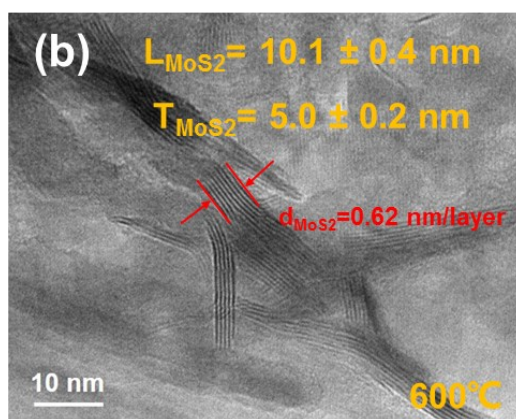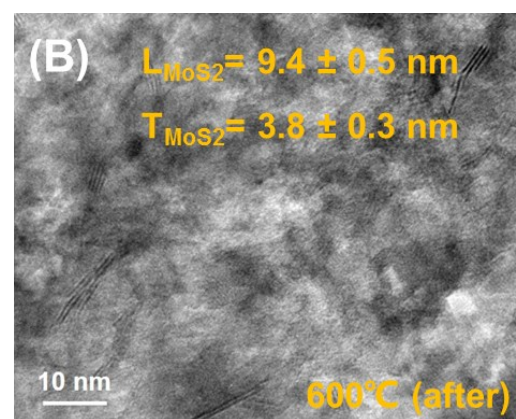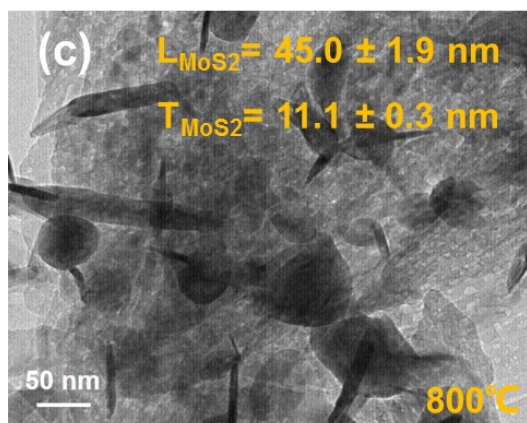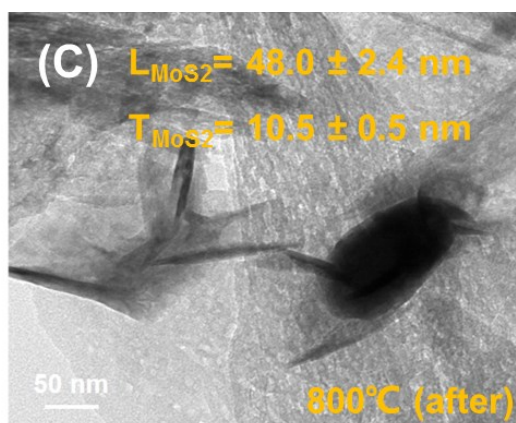



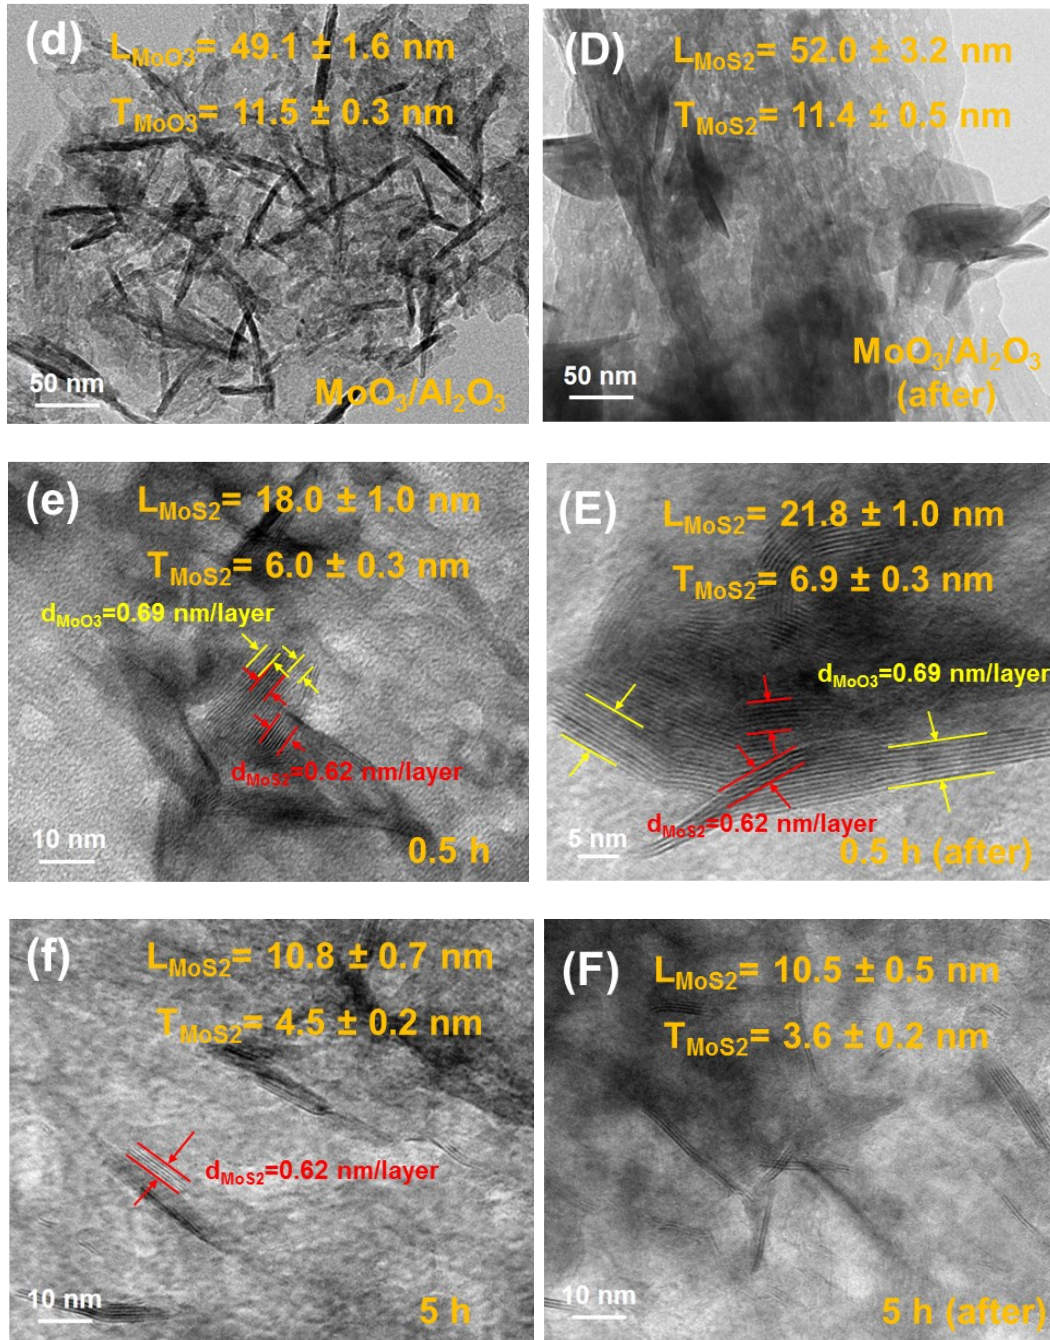

**Fig. S8.** TEM images of the  $\text{MoO}_3/\gamma\text{-Al}_2\text{O}_3$  catalyst sulfurized at different temperatures with 1 h (a, b, c), the corresponding catalyst after the reaction (A, B, C), and sulfurized with different time at 600 °C (d, e, f), the corresponding catalyst after the reaction (D, E, F). The letter  $L$  represents the mean length of  $\text{MoS}_2$  slabs and  $T$  is the mean thickness of  $\text{MoS}_2$  slabs.



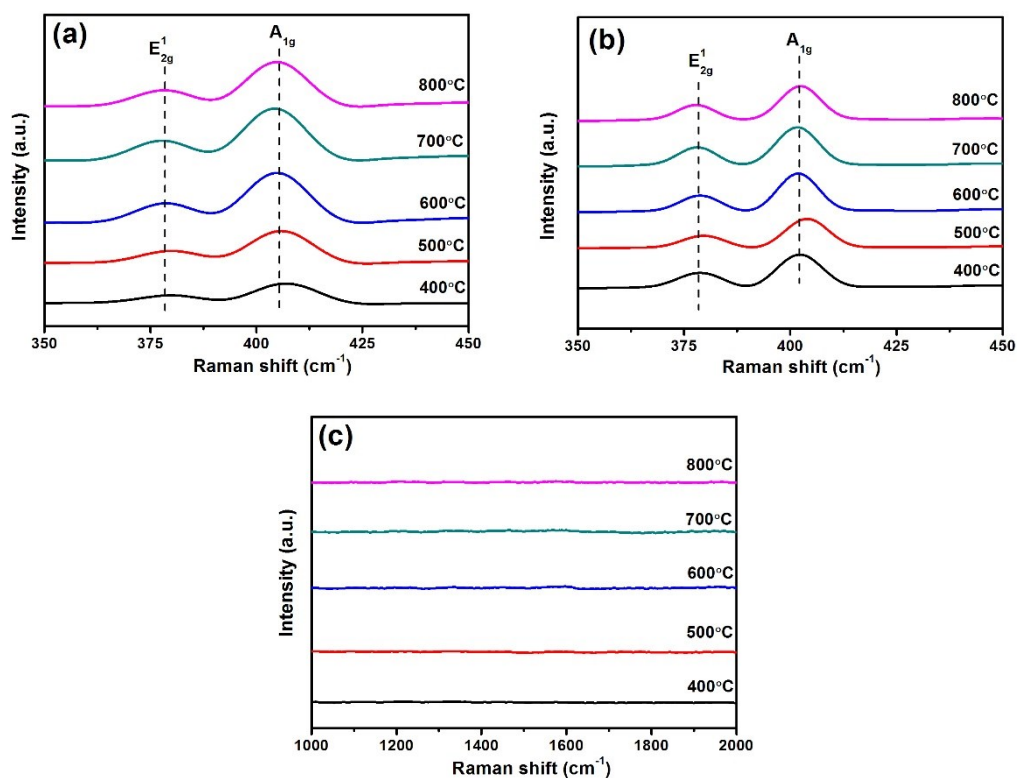

**Fig. S9.** Raman spectra of (a) 20 wt% MoO<sub>3</sub>/Al<sub>2</sub>O<sub>3</sub> after being sulfurized at different temperatures for 1 h, (b) the corresponding sulfurized samples after 2 h reaction test at 800 °C, and (c) the spectra in a range of 1000 – 2000 cm<sup>-1</sup> for the samples of (b).

**Table S1.** Raman peak parameters of MoO<sub>3</sub>/Al<sub>2</sub>O<sub>3</sub> sample sulfurized at different temperatures before and after the reaction.

| Sulfidation<br>condition<br>(temperature,<br>time) | Sulfided catalyst                                   |                                        |                                       |                    | Sulfided catalyst after reaction                    |                                        |                                       |                    |
|----------------------------------------------------|-----------------------------------------------------|----------------------------------------|---------------------------------------|--------------------|-----------------------------------------------------|----------------------------------------|---------------------------------------|--------------------|
|                                                    | E <sub>2g</sub> <sup>1</sup><br>(cm <sup>-1</sup> ) | A <sub>1g</sub><br>(cm <sup>-1</sup> ) | Differenc<br>e<br>(cm <sup>-1</sup> ) | stacking<br>number | E <sub>2g</sub> <sup>1</sup><br>(cm <sup>-1</sup> ) | A <sub>1g</sub><br>(cm <sup>-1</sup> ) | Differenc<br>e<br>(cm <sup>-1</sup> ) | stacking<br>number |
| 400 °C, 1 h                                        | 380.03                                              | 406.65                                 | 26.62                                 | 7                  | 379.15                                              | 402.23                                 | 23.08                                 | 13                 |
| 500 °C, 1 h                                        | 380.03                                              | 406.65                                 | 26.62                                 | 7                  | 379.15                                              | 404.00                                 | 24.85                                 | 6                  |
| 600 °C, 1 h                                        | 378.25                                              | 404.88                                 | 26.62                                 | 7                  | 379.15                                              | 402.23                                 | 23.08                                 | 7                  |
| 700 °C, 1 h                                        | 378.25                                              | 404.88                                 | 26.62                                 | 10                 | 377.37                                              | 402.23                                 | 24.85                                 | 12                 |
| 800 °C, 1 h                                        | 378.25                                              | 404.88                                 | 26.62                                 | 16                 | 377.37                                              | 402.23                                 | 24.85                                 | 16                 |

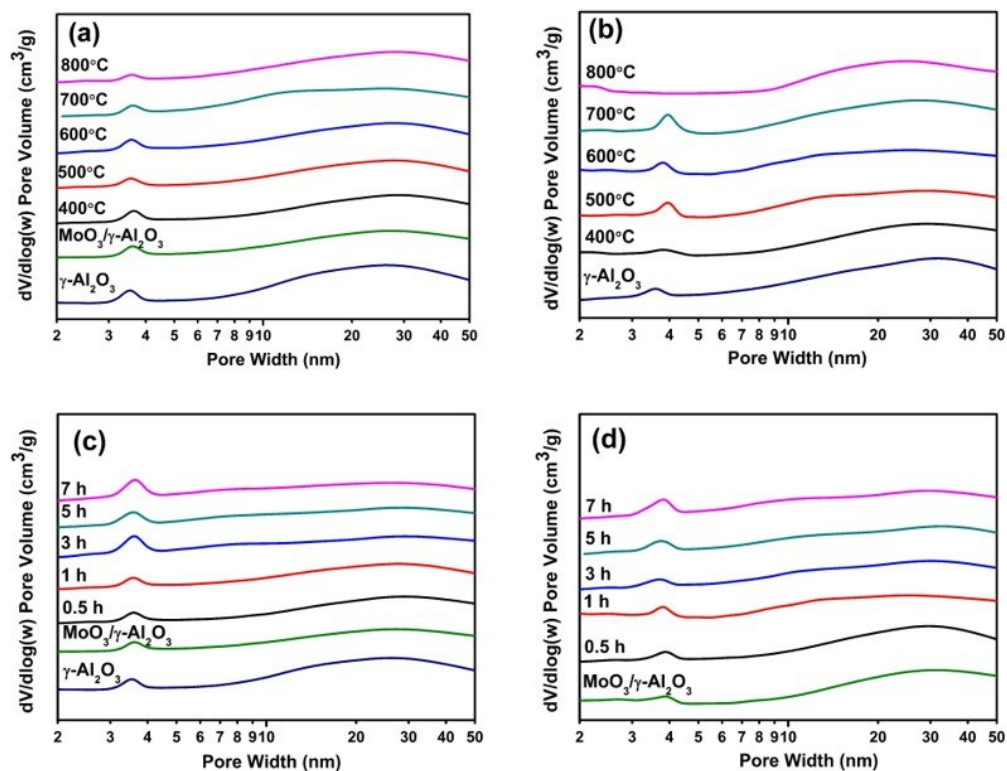

**Fig. S10.** The pore size distributions of (a, c)  $\text{MoO}_3/\gamma\text{-Al}_2\text{O}_3$  after being sulfurized at different conditions, and (b, d) the corresponding sulfurized samples after 2 h reaction test at 800 °C. The pore size distributions of the untreated  $\text{MoO}_3/\gamma\text{-Al}_2\text{O}_3$  sample before and after the reaction and the  $\gamma\text{-Al}_2\text{O}_3$  support are also included.

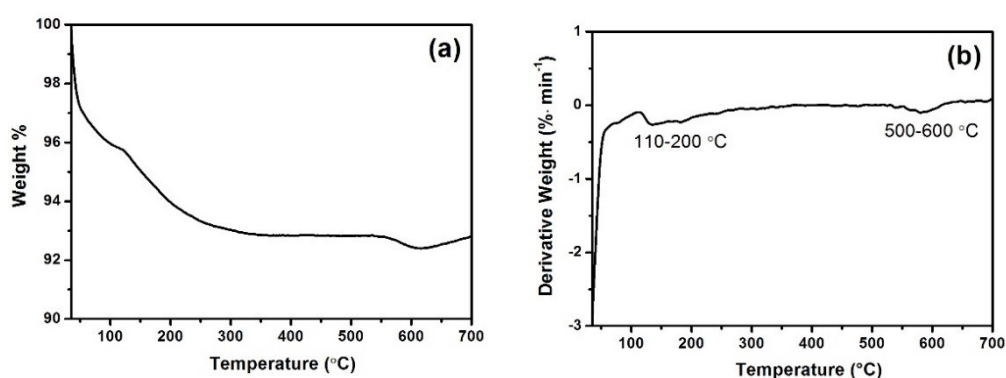

**Fig. S11.** (a) TGA curve and (b) corresponding DTG curve obtained under air flow for the  $\gamma\text{-Al}_2\text{O}_3$  sample after reaction test at 800 °C for 2 h.

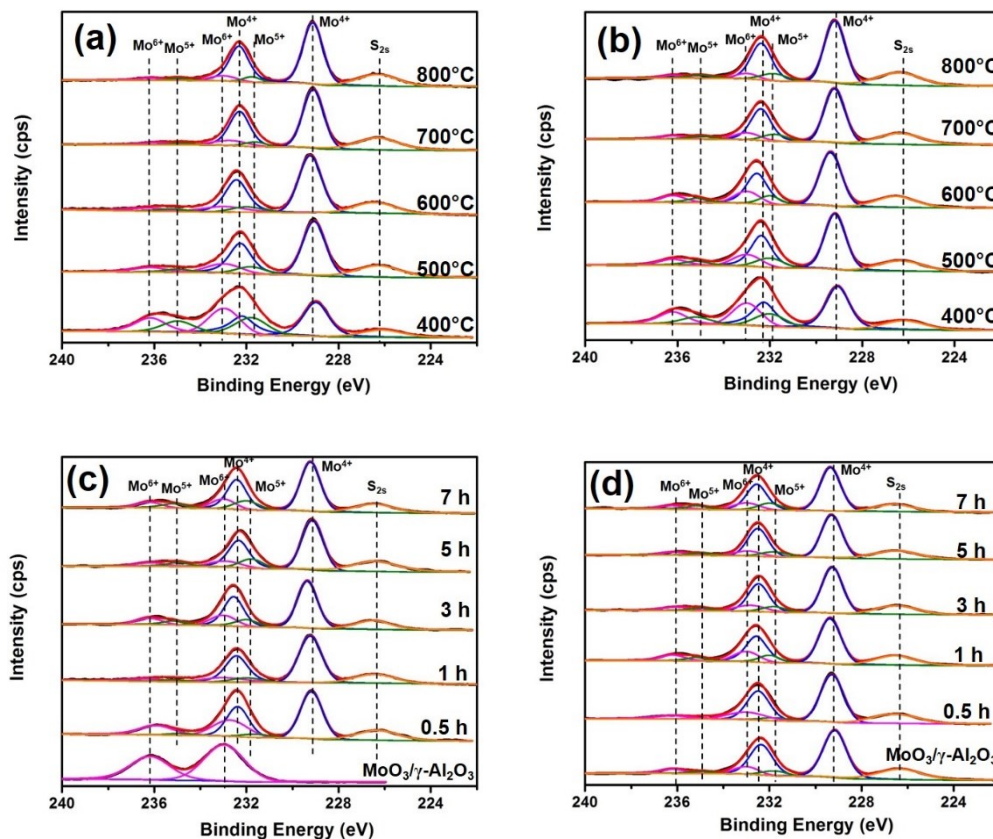

Fi

**g. S12.** XPS Mo 3d spectra of the MoO<sub>3</sub>/γ-Al<sub>2</sub>O<sub>3</sub> catalyst sulfurized at different temperatures with 1 h before (a) and after (b) the reaction, and sulfurized with different time at 600 °C before (c) and after (d) the reaction.

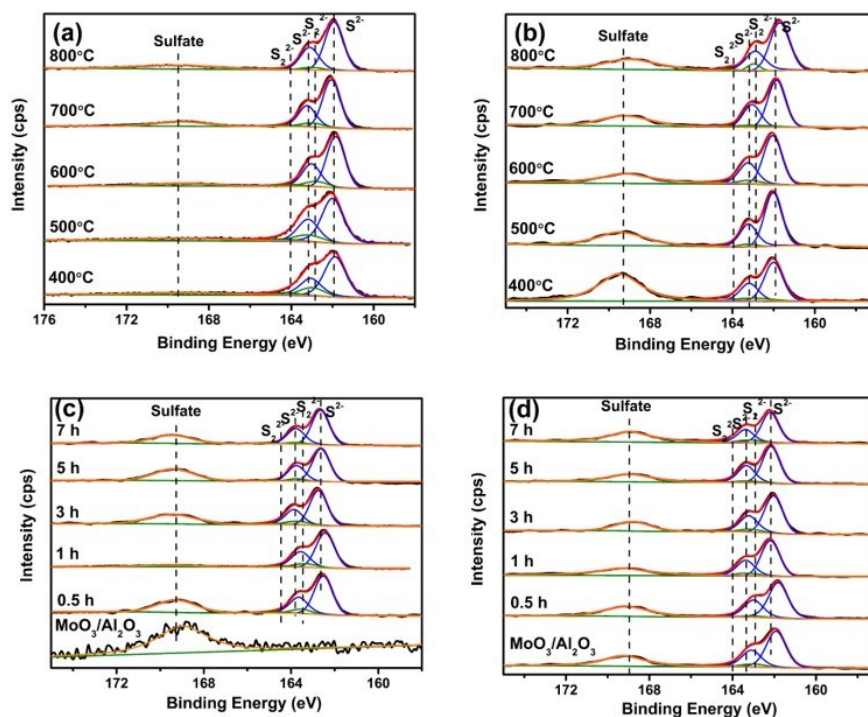

**Fig. S13.** XPS S 2p spectra of the  $\text{MoO}_3/\gamma\text{-Al}_2\text{O}_3$  catalyst sulfurized at different temperatures with 1 h before (a) and after (b) the reaction, and sulfurized with different time at 600 °C before (c) and after (d) the reaction.

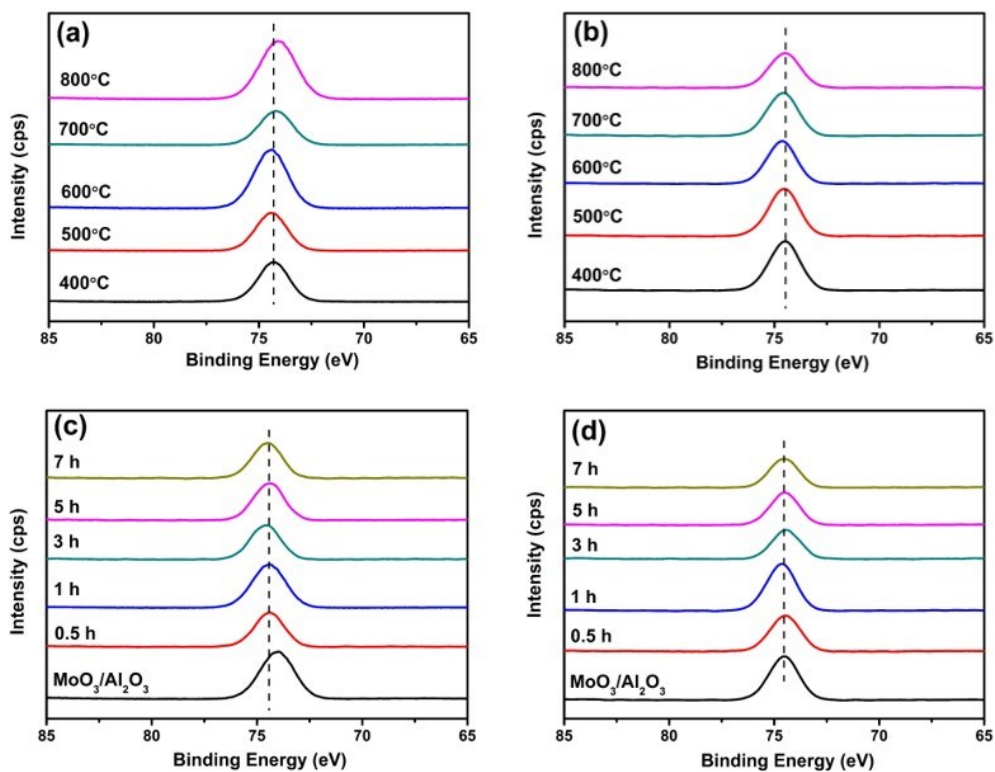

**Fig. S14.** XPS Al 2p spectra of the  $\text{MoO}_3/\gamma\text{-Al}_2\text{O}_3$  catalyst sulfurized at different temperatures with 1 h before (a) and after (b) the reaction, and sulfurized with different time at 600 °C before (c) and after (d) the reaction.

**Table S2.** The catalytic performance of MoO<sub>3</sub>/γ-Al<sub>2</sub>O<sub>3</sub> sample sulfurized at optimal conditions and the results derived from citations for comparison.

| Samples                                             | Sulfidation condition                                            | Reaction condition | Feed flow                                                               | Residence Time (GHSV)                        | Catalyst weight (volume) | H <sub>2</sub> S conversion (%) and reaction rate (mmol/g <sub>cat</sub> ·min) | CH <sub>4</sub> conversion (%) and reaction rate (mmol/g <sub>cat</sub> ·min) | H <sub>2</sub> production rate (mmol/g <sub>cat</sub> ·min) | Ref.       |
|-----------------------------------------------------|------------------------------------------------------------------|--------------------|-------------------------------------------------------------------------|----------------------------------------------|--------------------------|--------------------------------------------------------------------------------|-------------------------------------------------------------------------------|-------------------------------------------------------------|------------|
| MoO <sub>3</sub> /Al <sub>2</sub> O <sub>3</sub>    | 100 ml/min, 20%H <sub>2</sub> S/N <sub>2</sub> , 500 °C, 1 h     | 800 °C, 1 atm      | 100 ml/min, CH <sub>4</sub> /H <sub>2</sub> S/N <sub>2</sub> =1.5:1:7.5 | 0.24 s (15000 h <sup>-1</sup> )              | 0.16 g (0.4 ml)          | 39.7%, 1.16                                                                    | 13.2%, 0.59                                                                   | 1.82                                                        | This study |
| MoO <sub>3</sub> /Al <sub>2</sub> O <sub>3</sub>    | 100 ml/min, 20%H <sub>2</sub> S/N <sub>2</sub> , 600 °C, 1 h     |                    |                                                                         |                                              |                          | 37.9%, 1.10                                                                    | 12.5%, 0.54                                                                   | 1.73                                                        |            |
| MoS <sub>2</sub>                                    | -                                                                | 790 °C, 1 atm      | 180 ml/min, CH <sub>4</sub> /H <sub>2</sub> S=0.479:0.521               | 1.65 s                                       | 6.74 g (4.95 ml)         | 31.7%, 0.20                                                                    | -                                                                             | 0.33                                                        | [17]       |
| Mo/La <sub>2</sub> O <sub>3</sub> -ZrO <sub>2</sub> | 5.95 L/h H <sub>2</sub> S /6.84 L/h N <sub>2</sub> , 450 °C, 4 h | 850 °C, 1 atm      | 0.189 L/h CH <sub>4</sub> , 2.268 L/h H <sub>2</sub> S                  | 1.46 kg <sub>cat</sub> ·h/mol <sub>CH4</sub> | 3 g                      | 44%, 0.93                                                                      | 97%, 0.18                                                                     | -                                                           | [29]       |



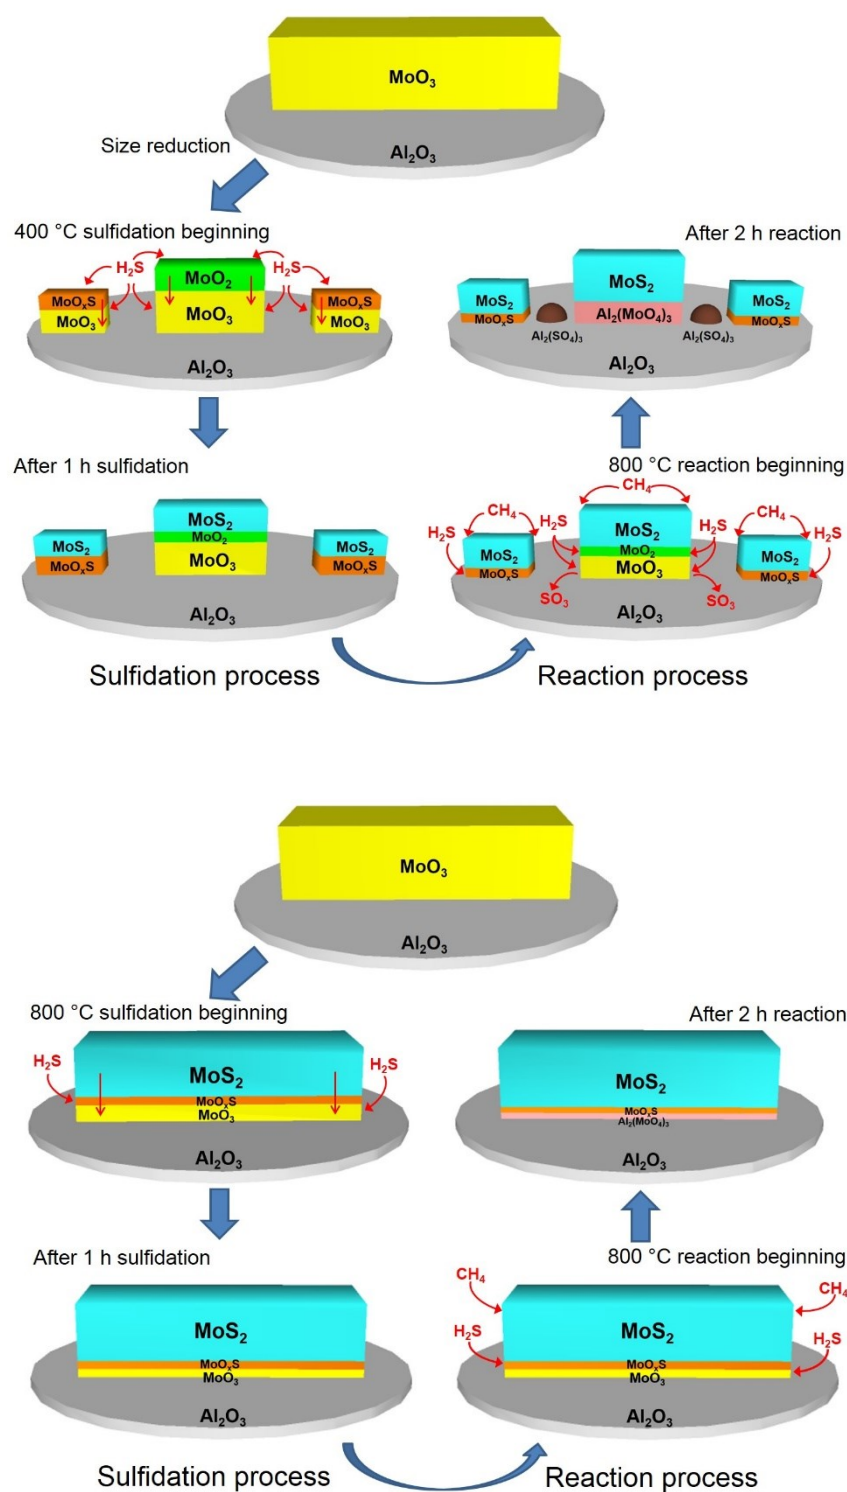

**Fig. S15.** Schematic illustration of substance transformation of  $\text{MoO}_3/\gamma\text{-Al}_2\text{O}_3$  during the sulfidation at 400 °C (upper) or 800 °C (below) for 1 h followed by the reaction at 800 °C for 2 h.

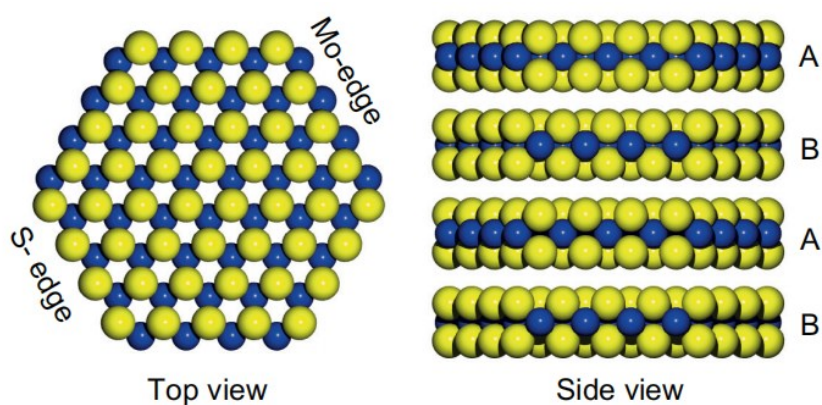

**Fig. S16.** The atomic model of the MoS<sub>2</sub> slab adopted from Refs. [71, 72] for edge Mo atom fraction calculation.

## References

- [17] S. K. Megalofonos and N. G. Papayannakos, *Int. J. Hydrogen Energy*, 1991, **16**, 319-327.
- [24] Y. Y. Li, H. Gen, X. Cui, X. Liu, X. Z. Xie and P. Li, *Chem. Eng. Oil & Gas*, 2016, **45**, 32-37. (In Chinese)
- [29] A. L. Martinez Salazar, J. A. Melo Banda, J. M. Dominguez Esquivel, V. H. Martinez Sifuentes, Y. Salazar Cerda, M. A. Coronel Garcia and M. A. Meraz Melo, *Int. J. Hydrogen Energy*, 2015, **40**, 17354-17360.
- [71] J.V. Lauritsen, M.V. Bollinger, E. Lægsgaard, K.W. Jacobsen, J.K. Nørskov, B.S. Clausen, H. Topsøe, F. Besenbacher, *J. Catal.*, 2004, **221**, 510-522.
- [72] A.S. Walton, J.V. Lauritsen, H. Topsoe, F. Besenbacher, *J. Catal.*, 2013, **308**, 306-318.
